# Supplementary material for: Racecadotril for acute diarrhoea in children: systematic review and meta-analyses
Source: PubMed Central journal article supplement — Arch Dis Child. 2015 Dec 29;101(3):234–40. doi: 10.1136/archdischild-2015-309676 (PMC4789705; doi:10.1136/archdischild-2015-309676), 2015-12-29
Supplement: archdischild-2015-309676-s1.pdf [file archdischild-2015-309676-s1.pdf]

## Appendix 1

- MEDLINE on PUBMED will be searched using the following search strategy:
  - 1. diarrhoea.mp.
  - 2. exp Diarrhea/
  - 3. (rotavirus or Norovirus).mp.
  - 4. gastroenteritis.mp.
  - 5. loose stool.mp.
  - 6. (watery and diarrhoea).mp.
  - 7. (acute and gastroenteritis).mp.
  - 8. (acute and diarrhoea).mp.
  - 9. (acute and diarrhea).mp.
  - 10. (watery and diarrhea).mp.
  - 11. (traveller's and diarrhoea).mp.
  - 12. (traveller's and diarrhea).mp
  - 13. 1 or 2 or 3 or 4 or 5 or 6 or 7 or 8 or 9 or 10 or 11 or 12
  
  - 14. exp Thiorphan/
  - 15. antisecretory.mp.
  - 16. (enkephalinase and inhibitor).mp.
  - 17. (neural endopeptidase and inhibitor).mp.
  - 18. (neural and endopeptidase and inhibitor).mp.
  - 19. (Aquasec or Cadot or Cadotril or Dirasec or Dotril or Enuff or Exdara or Hydral or Lomorest or Nodi or Normet or Pedidot or Racaril or Racedot or Raceloc or Racestat or Racet or Racex or Racigyl or Racotil or Racy or Ralop or Redotil or Rontap or Trotz or Welblock or Zedott or Zomatriil or Hidrasec or Tiorfix or Tiorfan).mp.
  - 20. 14 or 15 or 16 or 17 or 18 or 19
  
  - 21. (children or child).mp.
  - 22. child.mp.
  - 23. (pediatric or paediatric).mp.
  - 24. adolescent.mp.
  - 25. infant.mp.
  - 26. neonate.mp.
  - 27. (young and adult).mp.
  - 28. childhood.mp.
  - 29. Child, Preschool/ or Child/
  - 30. 21 or 22 or 23 or 24 or 25 or 26 or 27 or 28 or 29
  
  - 31. 13 and 20 and 30
